# Supplementary material for: Variation in the Genetic Repertoire of Viruses Infecting Micromonas pusilla Reflects Horizontal Gene Transfer and Links to Their Environmental Distribution
Source: PubMed Central journal article supplement (PMC5454428; doi:10.3390/v9050116), 2017-05-19
Supplement: viruses-09-00116-s001.pdf [file viruses-09-00116-s001.pdf]

# Supplementary Materials: Variation in the Genetic Repertoire of Viruses Infecting *Micromonas pusilla* Reflects Horizontal Gene Transfer and Links to Their Environmental Distribution

Jan F. Finke, Danielle M. Winget, Amy M. Chan and Curtis A. Suttle

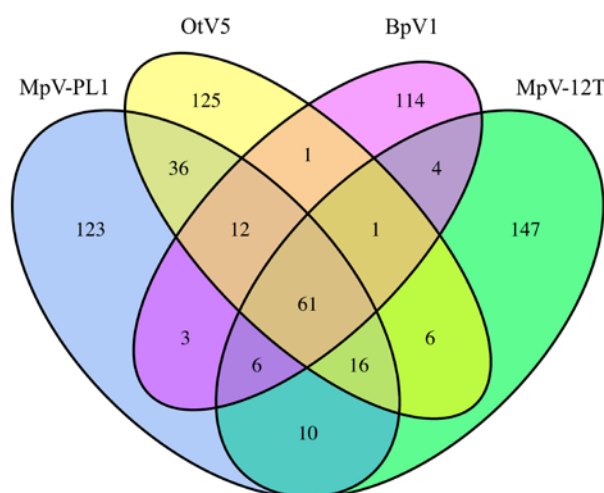

**Figure S1.** Venn diagram of the CDS of four prasinoviruses, based on clusters by 0.5 amino-acid identity.

**Table S1.** Sampling details and in situ conditions for environmental amplicon sequences from Jericho Pier, Point Atkinson, Juan de Fuca Strait and Saanich Inlet. Sampling date, location and depth given with in situ temperature (Temp.), salinity (Sal.). Field sampling volume (Vol.), type of pre-filter used in the lab, volume of viral concentrate (VC) and volume used for DNA extraction (Ext.) used are stated.

| Site                     | Year | Month    | Lat, Long         | Depth (m) | Temp. (°C) | Sal. (PSU) | Vol. (L) | Pre-filter    | VC (ml) | Ext. (ml) |
|--------------------------|------|----------|-------------------|-----------|------------|------------|----------|---------------|---------|-----------|
| Jericho Pier (JP)        | 2006 | June     |                   |           | 18         | 12         | 41       |               | 900     | 650       |
| Point Atkinson (PA)      | 2006 | June     | 48.45°N, 123.32°W | 1         | 14         | 23         | 45       | GC50-HVLP     | 795     | 650       |
| Juan de Fuca Strait (JF) | 2006 | July     |                   |           | 8.3        | 33         | 72       |               | 620     | 420       |
|                          | 2007 | April    |                   |           | na         | na         | ~20      |               | 245     | 1.7       |
|                          | 2008 | February |                   |           | 7.5        | 31         | 18       |               | 287     | 7.8       |
|                          | 2008 | March    |                   |           | 7.5        | 31         | 18       |               | 168     | 5.9       |
|                          | 2008 | April    |                   | 10        | 7.6        | 31         | 16       |               | 230     | 2.9       |
|                          | 2008 | June     |                   |           | 9.8        | 33         | 14       |               | 185     | 1.1       |
|                          | 2008 | August   |                   |           | 12         | 34         | 18       |               | 190     | 3.1       |
| Saanich Inlet (SI)       | 2008 | December | 48.58°N, 123.5°W  |           | 9          | 32         | 15       | GF/D-Sterivex | 210     | 11        |
|                          | 2007 | April    |                   |           | na         | na         | 17       |               | 220     | 10        |
|                          | 2008 | February |                   |           | 9.4        | 34         | 17       |               | 300     | 8.9       |
|                          | 2008 | March    |                   |           | 9.4        | 34         | 16       |               | 220     | 23        |
|                          | 2008 | April    |                   | 200       | 9.4        | 34         | 19       |               | 250     | 8.3       |
|                          | 2008 | June     |                   |           | 9.4        | 34         | 18       |               | 235     | 15        |
|                          | 2008 | August   |                   |           | 9.4        | 34         | 19       |               | 160     | 78        |
|                          | 2008 | December |                   |           | 9.2        | 34         | 16       |               | 186     | 41        |

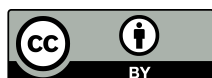

© 2017 by the authors. Submitted for possible open access publication under the terms and conditions of the Creative Commons Attribution (CC BY) license (<http://creativecommons.org/licenses/by/4.0/>).
